# Supplementary material for: Furan‐Based Copolyesters from Renewable Resources: Enzymatic Synthesis and Properties
Source: PubMed Central journal article supplement — ChemSusChem. 2019 Jan 28;12(5):990–9. doi: 10.1002/cssc.201802867 (PMC6563708; doi:10.1002/cssc.201802867), 2019-01-28
Supplement: CSSC-12-990-s001.pdf [file CSSC-12-990-s001.pdf]

## Supporting Information

### **Furan-Based Copolyesters from Renewable Resources: Enzymatic Synthesis and Properties**

Dina Maniar, Yi Jiang, Albert J. J. Woortman, Jur van Dijken, and Katja Loos<sup>\*[a]</sup>

[csc\\_201802867\\_sm\\_miscellaneous\\_information.pdf](#)

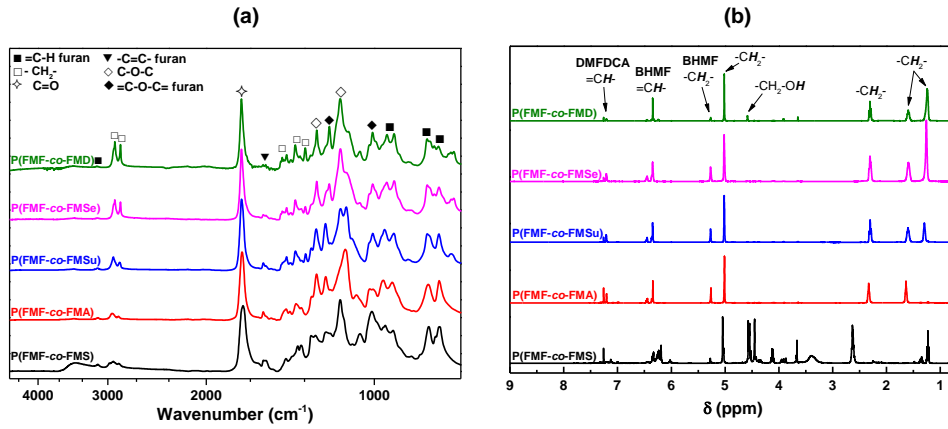

**Figure S1.** (a) ATR-FTIR, and (b) <sup>1</sup>H-NMR spectra of the obtained furan-based copolyesters from DMFDCA, BHMF, and diacid ethyl esters.

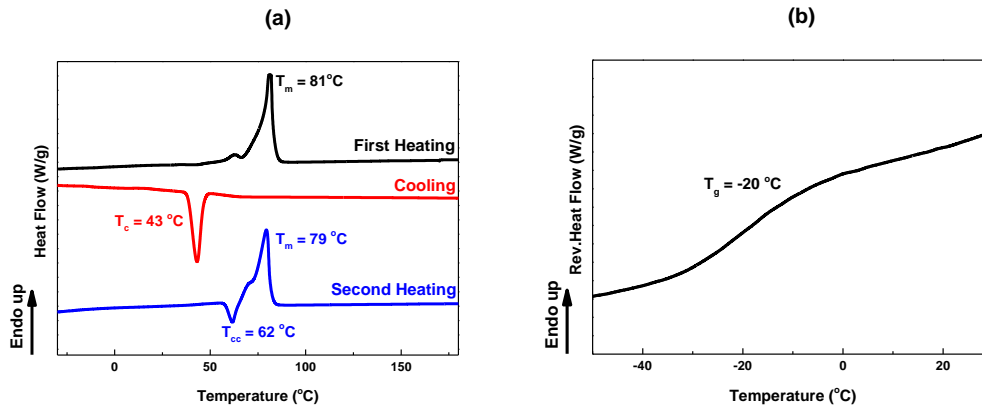

**Figure S2.** (a) DSC curves and (b) temperature modulated DSC (TMDSC) curves of P(FMF-co-FMD) from 12.5% DMFDCA, 50% BHMF and 37.5% diethyl dodecanedioate feed ratio.

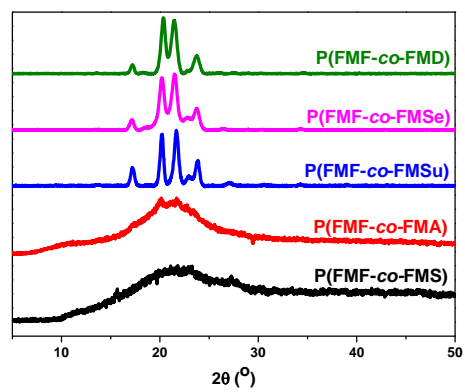

**Figure S3.** Wide-Angle X-Ray Diffraction (WAXD) spectra of the obtained furan-based copolyester from DMFDCA, BHMf and the diacid ethyl esters with feed ratio 12.5%: 50% : 37.5%, respectively.

**Table S1.** Molecular weights, degree of polymerization, and yield summary of the furan-based copolyesters obtained from different feed compositions of BHMf, DMFDCA, and aliphatic diols.

| Polyester     | Molar composition [%] |                |                 |                             |                |                 | Molecular Weight <sup>[c]</sup>            |                                            |                                                       | $\overline{DP}_n$ <sup>[d]</sup> | $\overline{DP}_w$ <sup>[e]</sup> | Yield <sup>[f]</sup> [%] |
|---------------|-----------------------|----------------|-----------------|-----------------------------|----------------|-----------------|--------------------------------------------|--------------------------------------------|-------------------------------------------------------|----------------------------------|----------------------------------|--------------------------|
|               | Feed <sup>[a]</sup>   |                |                 | Co-polyester <sup>[b]</sup> |                |                 | $\overline{M}_n$<br>[g mol <sup>-1</sup> ] | $\overline{M}_w$<br>[g mol <sup>-1</sup> ] | $\overline{D}$<br>( $\overline{M}_w/\overline{M}_n$ ) |                                  |                                  |                          |
|               | F <sub>D</sub>        | F <sub>B</sub> | F <sub>AD</sub> | X <sub>D</sub>              | X <sub>B</sub> | X <sub>AD</sub> |                                            |                                            |                                                       |                                  |                                  |                          |
| P(FMF-co-BF)  | 50                    | 12.5           | 37.5            | 49                          | 8              | 43              | 1975                                       | 2820                                       | 1.43                                                  | 18                               | 26                               | 61                       |
|               | 50                    | 25             | 25              | 49                          | 4              | 47              | 1400                                       | 1500                                       | 1.07                                                  | 13                               | 13                               | 22                       |
| P(FMF-co-HF)  | 50                    | 12.5           | 37.5            | 47                          | 12             | 41              | 5600                                       | 18000                                      | 3.21                                                  | 46                               | 149                              | 79                       |
|               | 50                    | 25             | 25              | 53                          | 7              | 40              | 1620                                       | 2110                                       | 1.30                                                  | 13                               | 17                               | 50                       |
| P(FMF-co-OF)  | 50                    | 12.5           | 37.5            | 46                          | 12             | 42              | 16050                                      | 35350                                      | 2.20                                                  | 122                              | 269                              | 86                       |
|               | 50                    | 25             | 25              | 47                          | 23             | 30              | 3100                                       | 5650                                       | 1.82                                                  | 24                               | 43                               | 40                       |
| P(FMF-co-DF)  | 50                    | 12.5           | 37.5            | 46                          | 12             | 42              | 13900                                      | 28650                                      | 2.06                                                  | 97                               | 201                              | 84                       |
|               | 50                    | 25             | 25              | 55                          | 8              | 37              | 1500                                       | 1600                                       | 1.07                                                  | 10                               | 11                               | 14                       |
| P(FMF-co-DOF) | 50                    | 12.5           | 37.5            | 46                          | 12             | 42              | 13150                                      | 24500                                      | 1.86                                                  | 86                               | 160                              | 96                       |
|               | 50                    | 25             | 25              | 54                          | 6              | 40              | 1860                                       | 2300                                       | 1.21                                                  | 11                               | 14                               | 39                       |

[a] F<sub>D</sub>, F<sub>B</sub>, F<sub>AD</sub> represent the molar feed ratio of DMFDCA, BHMf, and aliphatic diols, respectively. [b] X<sub>D</sub>, X<sub>B</sub>, X<sub>AD</sub> represent the molar percentage of DMFDCA, BHMf, and aliphatic diol segment in the obtained furan-based copolyester, determined from <sup>1</sup>H-NMR. [c] The number average molecular weight ( $\overline{M}_n$ ), weight average molecular weight ( $\overline{M}_w$ ), and dispersity ( $\overline{D}$ ,  $\overline{M}_w/\overline{M}_n$ ) were determined by SEC using CHCl<sub>3</sub> as the eluent. [d]  $\overline{DP}_n$  (number-average degree of polymerization) =  $2 \times [(\overline{M}_n - 62.06) / ((X_{FMF} \times M_{Repeating\ unit\ FMF}) + (X_{XF} \times M_{Repeating\ unit\ XF}))]$ . [e]  $\overline{DP}_w$  (weight-average degree of polymerization) =  $2 \times [(\overline{M}_w - 62.06) / ((X_{FMF} \times M_{Repeating\ unit\ FMF}) + (X_{XF} \times M_{Repeating\ unit\ XF}))]$ . [f] Isolated yield.

**Table S2.** Molecular weights, degree of polymerization, and yield summary of the furan-based copolyesters obtained from different feed compositions of BHMF, DMFDCA and diacid ethyl ester.

| Polyester      | Molar composition [%] |                |                 |                             |                |                 | Molecular Weight <sup>[c]</sup> |                        |                                                        | $\overline{DP}_n^{[d]}$ | $\overline{DP}_w^{[e]}$ | Yield <sup>[f]</sup> [%] |
|----------------|-----------------------|----------------|-----------------|-----------------------------|----------------|-----------------|---------------------------------|------------------------|--------------------------------------------------------|-------------------------|-------------------------|--------------------------|
|                | Feed <sup>[a]</sup>   |                |                 | Co-polyester <sup>[b]</sup> |                |                 | $\overline{M}_n$                | $\overline{M}_w$       | $\frac{\overline{D}}{(\overline{M}_w/\overline{M}_n)}$ |                         |                         |                          |
|                | F <sub>B</sub>        | F <sub>D</sub> | F <sub>DE</sub> | X <sub>B</sub>              | X <sub>D</sub> | X <sub>DE</sub> | [g mol <sup>-1</sup> ]          | [g mol <sup>-1</sup> ] |                                                        |                         |                         |                          |
| P(FMF-co-FMS)  | 50                    | 12.5           | 37.5            | 68                          | 14             | 18              | 600                             | 800                    | 1.33                                                   | 5                       | 7                       | 39                       |
|                | 50                    | 25             | 25              | 46                          | 37             | 17              | 700                             | 1300                   | 1.85                                                   | 5                       | 10                      | 21                       |
| P(FMF-co-FMA)  | 50                    | 12.5           | 37.5            | 50                          | 12             | 38              | 8900                            | 16850                  | 1.89                                                   | 73                      | 137                     | 47                       |
|                | 50                    | 25             | 25              | -[g]                        | -[g]           | -[g]            | 1800                            | 4100                   | 2.27                                                   | -[g]                    | -[g]                    | 6                        |
| P(FMF-co-FMSu) | 50                    | 12.5           | 37.5            | 49                          | 13             | 38              | 5400                            | 9300                   | 1.72                                                   | 41                      | 71                      | 56                       |
|                | 50                    | 25             | 25              | -[g]                        | -[g]           | -[g]            | -[g]                            | -[g]                   | -[g]                                                   | -[g]                    | -[g]                    | 3                        |
| P(FMF-co-FMSe) | 50                    | 12.5           | 37.5            | 50                          | 12             | 38              | 6350                            | 11650                  | 1.83                                                   | 44                      | 82                      | 29                       |
|                | 50                    | 25             | 25              | 48                          | 34             | 18              | -[g]                            | -[g]                   | -[g]                                                   | -[g]                    | -[g]                    | 2                        |
| P(FMF-co-FMD)  | 50                    | 12.5           | 37.5            | 51                          | 7              | 42              | 2500                            | 3450                   | 1.38                                                   | 16                      | 22                      | 35                       |
|                | 50                    | 25             | 25              | 36                          | 50             | 14              | 670                             | 1800                   | 2.68                                                   | 5                       | 13                      | 6                        |

[a]F<sub>B</sub>, F<sub>D</sub>, F<sub>DE</sub> represent the molar feed ratio of BHMF, DMFDCA and diacid ethyl esters, respectively. [b]X<sub>B</sub>, X<sub>D</sub>, X<sub>DE</sub> represent the molar percentage of BHMF, DMFDCA and diacid ethyl ester segment of the obtained furan-based copolyester, determined from <sup>1</sup>H-NMR. [c]The number average molecular weight ( $\overline{M}_n$ ), weight average molecular weight ( $\overline{M}_w$ ), and dispersity ( $\overline{D}$ ,  $\overline{M}_w/\overline{M}_n$ ) were determined by SEC using CHCl<sub>3</sub> as the eluent. [d]  $\overline{DP}_n$  (number-average degree of polymerization) =  $2 \times [(\overline{M}_n - 62.06) / ((X_{FMF} \times M_{Repeating\ unit\ FMF}) + (X_{FMX} \times M_{Repeating\ unit\ FMX}))]$ . [e]  $\overline{DP}_w$  (weight-average degree of polymerization) =  $2 \times [(\overline{M}_w - 62.06) / ((X_{FMF} \times M_{Repeating\ unit\ FMF}) + (X_{FMX} \times M_{Repeating\ unit\ FMX}))]$ . [f]Isolated yield. [g]Cannot be determined.

**Table S3.** Thermal properties of the obtained furan-based copolyester

| Polyester                    | DSC <sup>[b]</sup> |                 |               |                  | TGA <sup>[c]</sup>   |                     |
|------------------------------|--------------------|-----------------|---------------|------------------|----------------------|---------------------|
|                              | $T_g$<br>[°C]      | $T_m$<br>[°C]   | $T_c$<br>[°C] | $T_{cc}$<br>[°C] | $T_{d-10\%}$<br>[°C] | $T_{d-max}$<br>[°C] |
| P(FMF-co-BF) <sup>[a]</sup>  | -[d]               | 118             | 84            | -[d]             | 220                  | 370                 |
| P(FMF-co-HF) <sup>[a]</sup>  | -0.7               | 108             | 60            | 60               | 230                  | 380                 |
| P(FMF-co-OF) <sup>[a]</sup>  | 7                  | 88 <sup>e</sup> | -[d]          | -[d]             | 230                  | 390                 |
| P(FMF-co-DF) <sup>[a]</sup>  | -[d]               | 92              | 68            | -[d]             | 230                  | 390                 |
| P(FMF-co-DOF) <sup>[a]</sup> | -[d]               | 84              | 61            | -[d]             | 230                  | 390                 |

[a]Furan-based copolyester from DMFDCA, BHMf and aliphatic diol with feed ratio 50 % : 25 % : 25 %, respectively. [b] $T_g$  = glass transition temperature measured from the modulated DSC heating scan,  $T_m$  = melting temperature measured from the second DSC heating scan,  $T_c$  = crystallization temperature upon cooling,  $T_{cc}$  = cold crystallization temperature from the second DSC heating scan. [c] $T_{d-10\%}$  = decomposition temperature at 10 % weight loss,  $T_{d-max}$  = temperature at maximum rate of decomposition. [d]not detected at the tested temperature range. [e]Measured from the first DSC heating scan.
